# Supplementary material for: Photocatalytic oxidation of methanol using porous Au/WO3 and visible light
Source: Royal Society of Chemistry journal article supplement (doi:10.1039/c6cy01449f), 2016-01-01
Supplement: c6cy01449f1.pdf [file c6cy01449f1.pdf]

Electronic Supplementary Information for

## Photocatalytic Oxidation of Methanol Using Porous Au/WO<sub>3</sub> and Visible Light

*Daniel P. DePuccio and Christopher C. Landry\**

*Department of Chemistry, University of Vermont  
82 University Place, Burlington, VT 05405*

\*To whom correspondence should be addressed. E-mail: christopher.landry@uvm.edu. Fax: +1 802 656 8705.

| <b>Contents</b>                                                                                                                         | <b>Page</b> |
|-----------------------------------------------------------------------------------------------------------------------------------------|-------------|
| Synthesis details for materials studied in this work                                                                                    | S-1         |
| ICP-OES sample preparation details                                                                                                      | S-3         |
| XRD patterns of bulk WO <sub>3</sub> ((B)-WO <sub>3</sub> ) and porous TiO <sub>2</sub> ( <b>Figure S1</b> )                            | S-4         |
| N <sub>2</sub> physisorption data for catalysts without Au NPs ( <b>Figure S2</b> )                                                     | S-5         |
| N <sub>2</sub> physisorption data for catalysts modified with Au NPs ( <b>Figure S3</b> )                                               | S-6         |
| Product distributions for the WO <sub>3</sub> -Au(3) catalyst at 2 h of irradiation with varying total flow rates. ( <b>Figure S4</b> ) | S-7         |

### Synthesis of acid-prepared mesoporous spheres ( $\text{SiO}_2$ )

Cetyltrimethyl ammonium bromide (CTAB, 9.0 g, 24.7 mmol) was dissolved in a solution of deionized water (198 g, 11 mol), ethanol (200 proof, 55.5 g, 1.20 mol), and concentrated HCl (37 wt%, 22.0 g, 223.0 mmol) at room temperature with vigorous stirring. Tetraethoxysilane (TEOS, 20.0g, 96.0 mmol) was then added and stirring was continued for 5 min, after which a solution of NaF (0.5M, 23.8 g, 11.9 mmol) was added. The solution became turbid in about 83 s and was immediately transferred to a Teflon bottle that was sealed and placed in an oven at 373 K for 160 min. The bottle was then removed from the oven and cooled at room temperature for 60 min before filtration of the product and washing with water and ethanol. Following air drying of the product at room temperature, the material was calcined under flowing air with the following heating program: ramp from 298 K to 723 K at 2 K min<sup>-1</sup>, hold at 723 K for 240 min, ramp to 823 K at 10 K min<sup>-1</sup>, and hold at 823 K for 480 min before cooling to room temperature. This sample is denoted as  $\text{SiO}_2$ .

### Sonochemical deposition of Au NPs onto APMS ( $\text{SiO}_2\text{-Au}$ )

Calcined APMS was dried at 100 °C overnight (1.0 g) before being dispersed in 150 mL H<sub>2</sub>O in a 250 mL round-bottom flask with stir bar and then stirred for 10 min. Brief sonication of the flask (water bath-type sonicator, Branson 2510, 40 kHz, 130 W) was done to break up aggregates of SiO<sub>2</sub>. A solution of chloroauric acid (0.0255 M HAuCl<sub>4</sub>•3H<sub>2</sub>O, 1.366 mL, 0.0372 mmol Au) was then added and stirring continued for 30 – 40 min. Sonication of the mixture began as above, during which, concentrated aqueous ammonium hydroxide (29 wt% NH<sub>3</sub>, 4 mL, 61.3 mmol NH<sub>3</sub>) was added dropwise over the course of the entire sonication period (45 min). The NH<sub>3</sub> : Au mole ratio was 1648 : 1, and the reaction mixture pH = 10.91. The product was filtered, washed with 250 mL water, dried under vacuum air at room temperature overnight, and calcined under air flow at 773 K for 3 h (ramp rate = 0.95 K min<sup>-1</sup>) yielding a red colored product. This sample is denoted as  $\text{SiO}_2\text{-Au}$ .

### Incipient wetness impregnation of $\text{SiO}_2$ with ammonium metatungstate and etching of $\text{SiO}_2$ to yield $\text{WO}_3$

About 3 g  $\text{SiO}_2$  was added to a crucible and then an aqueous solution of ammonium metatungstate (AMT, 1.5 g AMT/mL H<sub>2</sub>O) was added dropwise to the dry powder via incipient wetness (2.992 cm<sup>3</sup> g<sup>-1</sup> = total pore volume of  $\text{SiO}_2$ ). The damp mixture was manually stirred for 10 min, and then the mixture was left to dry at room temperature in air for 4.5 h. The dry powder was then calcined under air flow with the following program: ramp from 298 K to 423 K, hold at 423 K for 3 h, ramp to 523 K, hold at 523 K for 3 h, ramp to 823 K, hold at 823 K for 5 h. All ramp rates were 1 K min<sup>-1</sup>. The impregnation, drying, and calcination steps were repeated a second time. This yielded a yellowish-green colored SiO<sub>2</sub>-WO<sub>3</sub> composite powder.

To remove the silica template, the SiO<sub>2</sub>-WO<sub>3</sub> composite (1.0 g) was added to 11 mL of 10% HF in H<sub>2</sub>O (1 mL concentrated HF with 9 mL H<sub>2</sub>O) contained in a 15 mL plastic centrifuge tubes. *Caution: HF is extremely toxic and corrosive, wear appropriate personal protective equipment while using this acid.* The sealed tubes were placed on orbital shakers to mix gently for approximately 4 h. The solids were then centrifuged and the supernatant disposed of appropriately. The particles were washed three times with 11 mL H<sub>2</sub>O and then once with 11 mL ethanol. The washed samples were left to dry in the centrifuge tube under air in an oven at 353 K overnight. The resulting sample is denoted as **WO<sub>3</sub>**.

#### Bulk WO<sub>3</sub> preparation (**(B)-WO<sub>3</sub>**)

Ammonium metatungstate hydrate (AMT, (NH<sub>4</sub>)<sub>6</sub>H<sub>2</sub>W<sub>12</sub>O<sub>40</sub> • xH<sub>2</sub>O, 4.3 g) was ground into a fine powder and then calcined in the same way to form the SiO<sub>2</sub>-WO<sub>3</sub> composite above.

#### Porous TiO<sub>2</sub> preparation (**TiO<sub>2</sub>**)

In a beaker, 2.0 g SiO<sub>2</sub> was mixed with 40 mL of a 50/50 (v/v) solution of ethanol and titanium isopropoxide (Ti(*i*PrO)<sub>4</sub>). Brief sonication was utilized to disperse the powder, and then stirring continued for 20 h. The mixture was then centrifuged and the supernatant was removed. The product was left to dry over night at 90 °C. The dry powder was mixed with another 40 mL ethanol and was added to yield 40 mL 50/50 (v/v) solution of Ti(*i*PrO)<sub>4</sub> and ethanol, then dried at 80 °C. A 20 mL Ti(*i*PrO)<sub>4</sub>/ethanol solution was mixed with the powder followed by centrifugation, decantation of the supernatant and then drying at 60 °C. Hydrolysis of the Ti(*i*PrO)<sub>4</sub> precursor loaded inside the pores of SiO<sub>2</sub> was completed with a 40 mL 50/50 (v/v) solution of water and ethanol for 3 h. After evaporation of the solvent at 60 °C, the sample was calcined with the same program as used for SiO<sub>2</sub>, to yield SiO<sub>2</sub>-TiO<sub>2</sub>.

The SiO<sub>2</sub>-TiO<sub>2</sub> composite was added to 2M NaOH in a plastic centrifuge tube and shaken for about 3 h to remove the silica portion of the composite. Following centrifugation and removal of the supernatant, the material was added to a fresh solution of 2M NaOH for a second and then a third time. The final material was dried at 60 °C overnight. This sample is denoted as **TiO<sub>2</sub>**.

#### Sonochemical deposition of Au NPs onto SiO<sub>2</sub>-WO<sub>3</sub> followed by SiO<sub>2</sub> removal (**WO<sub>3</sub>-Au**)

The SiO<sub>2</sub>-WO<sub>3</sub> composite (1.3 g) was first dried at 100 °C overnight and then added to 195 mL H<sub>2</sub>O in a 250 mL round-bottom flask with stir bar and then stirred for 10 min. Brief sonication was used to break up aggregates of SiO<sub>2</sub>-WO<sub>3</sub>. Different volumes of chloroauric acid (0.0255 M H<sub>2</sub>AuCl<sub>4</sub>•3H<sub>2</sub>O) were added to the suspension depending on the desired nominal wt% loading of Au NPs. For 1 wt% Au (based on the mass of SiO<sub>2</sub>-WO<sub>3</sub>), 2.521 mL (0.0687 mmol Au) were used, and for 3 wt% Au, 7.873 mL (0.215 mmol Au) were used. The suspension was stirred for 30 – 40 min. Sonication of the mixture began as above,

during which, concentrated aqueous ammonium hydroxide (29 wt%  $\text{NH}_3$ , 5.2 mL, 79.7 mmol  $\text{NH}_3$ ) was added dropwise over the course of the entire sonication period (45 min). The  $\text{NH}_3$  : Au mole ratio (and pH) was 1160 : 1 (pH = 10.45) and 371 : 1 (pH = 10.76 ) for the 1 wt% Au sample and the 3 wt% sample, respectively. After filtration, washing, drying, and calcination as done with **SiO<sub>2</sub>-Au** above, dark, wine purple-colored **SiO<sub>2</sub>-WO<sub>3</sub>-Au** powders were obtained. The **SiO<sub>2</sub>** portion of the **SiO<sub>2</sub>-WO<sub>3</sub>-Au** product was removed with 10% HF as described above. Some Au NPs are lost during this process as confirmed by the purple colored supernatant observed during washes. The samples are denoted as **WO<sub>3</sub>-Au(1)** and **WO<sub>3</sub>-Au(3)**, where the number in parentheses is the nominal Au wt% used in the synthesis.

#### ICP-OES sample preparation procedures

Samples were first dried at 100 °C in air for several hours. Additionally, samples that were previously etched (free of **SiO<sub>2</sub>**) were calcined at 500 °C for 3 h in air to remove residual ethanol that was adsorbed during the washing step. Samples were first digested by adding 0.020 g of material to 1 mL of 2 M NaOH in a 1.5 mL Eppendorf tube followed by approximately 30 min of ultrasonication. Mixtures were left to shake vigorously for several hours to completely dissolve **SiO<sub>2</sub>** and **WO<sub>3</sub>** components. Samples containing Au NPs were allowed to settle overnight before subsequent centrifugation (15,000 rpm, 2 min) and separation. The Au pellet was washed with 1 mL  $\text{H}_2\text{O}$  then centrifuged. The supernatants were added to the initial digest solution of **SiO<sub>2</sub>** and/or **WO<sub>3</sub>**. Three total  $\text{H}_2\text{O}$  washings were performed, and then the digest solution was adjusted to 0.1 M NaOH with  $\text{H}_2\text{O}$ . Diluted digest solutions of **SiO<sub>2</sub>** and **WO<sub>3</sub>** were prepared with 0.1 M NaOH in 100 mL volumetric flasks. Gold nanoparticles were quantitatively transferred via pipet from the Eppendorf tube with water to a vial and then evaporated to near dryness on a hot plate. The Au NP residue was then digested in aqua regia and then heated to evaporate solution to near dryness. To the Au/aqua regia residue, approximately 2 mL 0.5 M HCl was added, swirled, and then evaporated by heating until residue remained. This washing/evaporation step was repeated a twice before transferring the Au solution to a 25 mL volumetric flask and diluting to mark with 0.5 M HCl. Concentrations of Au, Si, and W were quantified by calibration curves using emission wavelengths of 267.599 nm, 251.611 nm, and 207.912 nm, respectively.

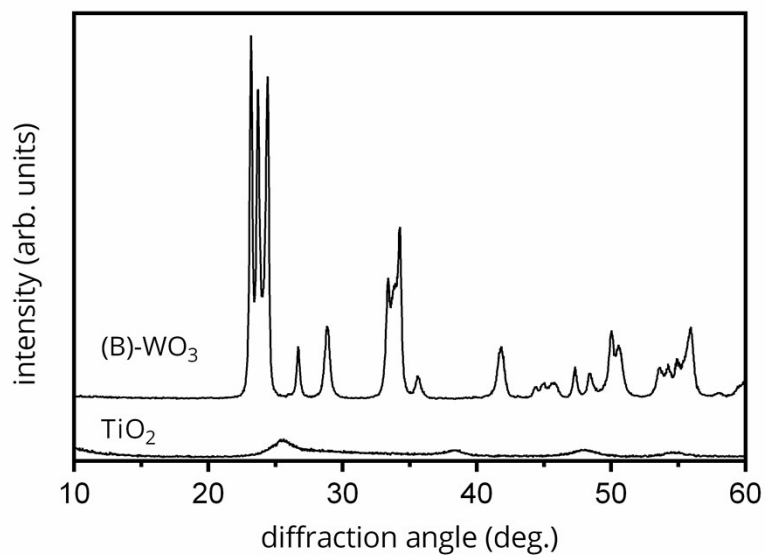

**Figure S1.** XRD patterns of (B)-WO<sub>3</sub> and porous TiO<sub>2</sub>. Monoclinic WO<sub>3</sub> and anatase TiO<sub>2</sub> are the only observed crystalline phases for these samples.

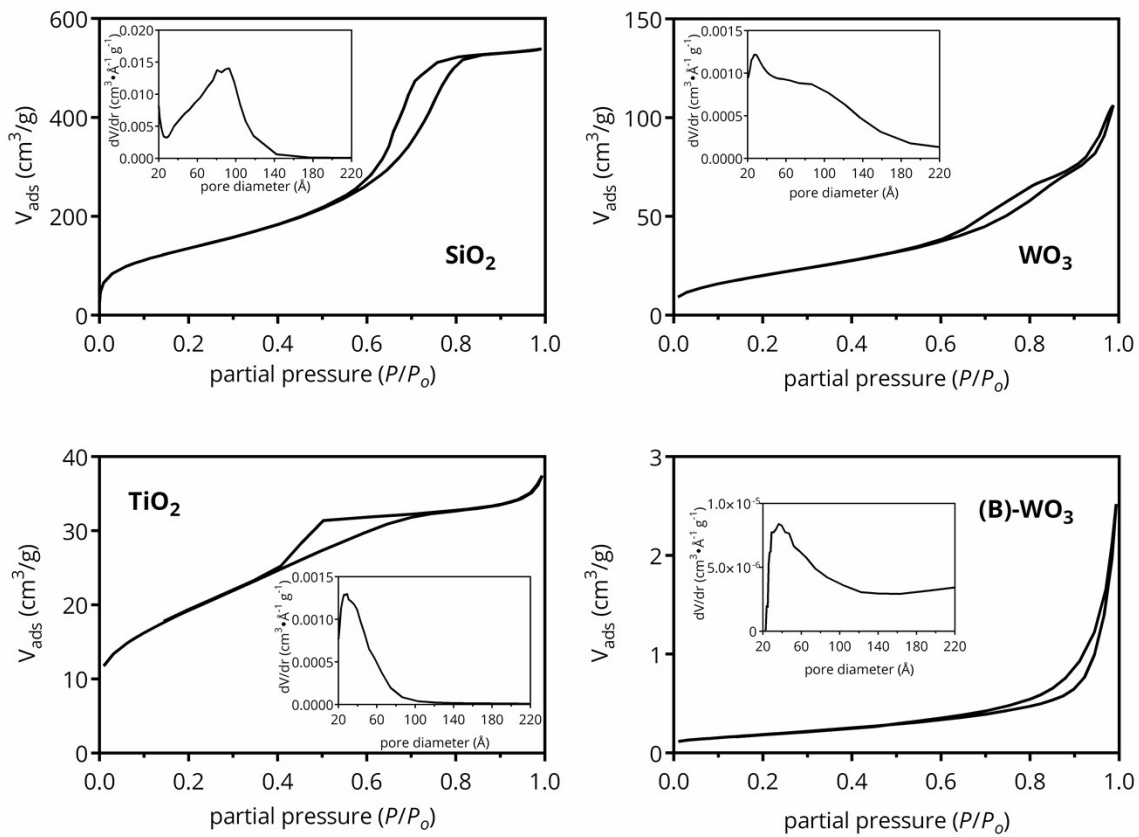

**Figure S2.** N<sub>2</sub> physisorption isotherms and pore size distributions (insets) for catalysts not modified with Au NPs.

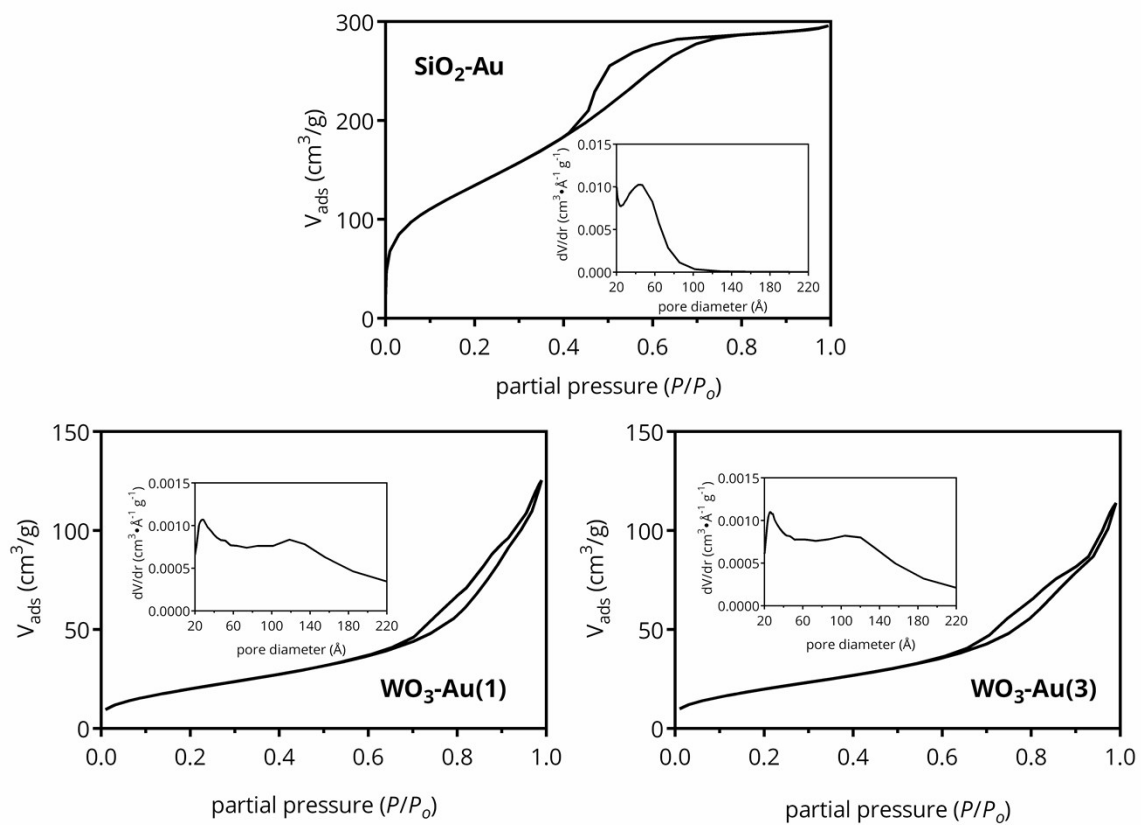

**Figure S3.**  $N_2$  physisorption isotherms and pore size distributions (insets) for Au-modified catalysts.

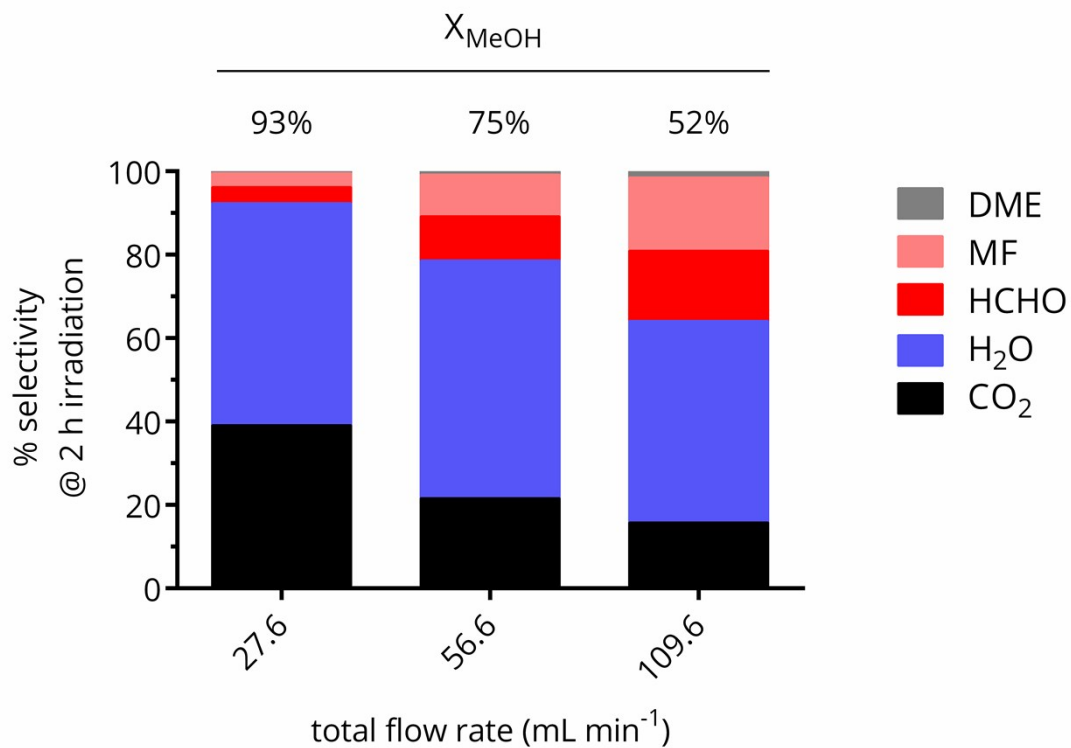

**Figure S4.** Product distributions for the WO<sub>3</sub>-Au(3) catalyst at 2 h of irradiation with varying total flow rates. Methanol conversions (%) at 2 h of irradiation are shown above each distribution.
